# Supplementary material for: Low health literacy predicts decline in physical function among older adults: findings from the LitCog cohort study
Source: HighWire-hosted journal article supplement (doi:10.1136/jech-2014-204915), 2015-01-08
Supplement: jech-2014-204915supp.pdf [file jech-2014-204915supp.pdf]

**Online Appendix**

| Trait                                    | Measure                           | Source              | Description                                                                                                                                                                                                 |
|------------------------------------------|-----------------------------------|---------------------|-------------------------------------------------------------------------------------------------------------------------------------------------------------------------------------------------------------|
| Fluid abilities<br>Processing speed      | Digital comparison                | Salthouse           | Compare strings of digits that are the same or different, completing as many trials as possible in a given time period.                                                                                     |
|                                          | Pattern comparison                | Salthouse & Babcock | Compare pairs of simple line drawings that are the same or different, completing as many trials in a given time period.                                                                                     |
|                                          | Symbol digit modalities           | WPS                 | Match symbols to appropriate digits via a legend marking designated symbol-digit pairings, completing as many matches as possible in a given time period.                                                   |
| Working memory                           | Spatial Span Length – Reverse     | CANTAB              | Participants are shown differently sized sets of boxes highlighted in specific orders and then must indicate the reverse order in which each set of boxes were highlighted.                                 |
|                                          | Spatial Working Memory (SWM)      | CANTAB              | Find tokens hidden behind boxes while clicking as few boxes as possible, keeping track of which boxes have already been searched.                                                                           |
|                                          | Size Judgement Span               | Cherry & Park       | Read lists of differing amounts of randomly ordered, size-constant items and reorder items from smallest to largest.                                                                                        |
| Inductive Reasoning                      | ETS Letter Sets                   | ETS                 | Participants are shown series of sets of letters and must decide which set of letters in each series does not follow the same pattern as the other sets in that series.                                     |
|                                          | Ravens Progressive Matrices       | Raven               | Participants are shown incomplete sets of patterns and must decide from multiple options which additional pattern would complete each set.                                                                  |
|                                          | Stockings of Cambridge (SOC)      | CANTAB              | Match one series of coloured balls sitting in stockings to another, allowing for movement of only one ball at a time and aiming to match the sets in as few moves as possible.                              |
| Long-Term Memory                         | Immediate Verbal Memory           | CANTAB              | Participants are shown a list of words and immediately asked to freely recall as many of the words as possible.                                                                                             |
|                                          | Delayed Verbal Memory             | CANTAB              | Freely recall as many words as possible from a previously read list after a delay of approximately 20 minutes.                                                                                              |
|                                          | New York Paragraph                | Kluger              | Read a short story and repeat back as much of the story as possible after an approximately 20 minute delay.                                                                                                 |
| Prospective Memory                       | LitCog 3-Step Assessment          | Wolf                | Participants are asked at the beginning of interview to remember to complete three simple tasks throughout the interviews (writing down times of a break and interview end time, returning a visitor pass). |
| Crystallised abilities<br>Verbal ability | AM-NART                           | Grober              | Read aloud a list of general words and assess for correct pronunciation.                                                                                                                                    |
|                                          | Graded Naming Test                | CANTAB              | Participants are shown a series of images depicting different objects and asked to identify each object.                                                                                                    |
|                                          | Shipley Institute of Living Scale | Shipley             | Participants must identify synonymous words via a multiple choice paradigm.                                                                                                                                 |

## References

- Salthouse TA. What do adult age differences in the digit symbol substitution test reflect? *J Gerontol: Psychol Sci* 1992;**47**:121–8.
- Salthouse TA, Babcock RL. Decomposing adult age differences in working memory. *Dev Psychol* 1991;**27**:763–76.
- Smith A. Symbol digit modalities test. Los Angeles: Western Psychological Services. 1991.
- Robbins TW, James M, Owen AM, Sahakian BJ, McInnes L, Rabbitt PMA. Cambridge Neuropsychological Test Automated Battery (CANTAB): A factor analytic study of a large sample of normal elderly volunteers. *Dement*. 1994;**5**:266–81.
- Cherry KE, Park DC. Individual difference and contextual variables influence spatial memory in younger and older adults. *Psychol Aging*. 1993;**8**:517–7.
- Ekstrom RB, French JW, Harman HH. ETS kit of factor-referenced cognitive tests. Princeton, NJ: Educational Testing Service; 1976.
- Raven JC. Standard progressive matrices: sets A, B, C, D and E. San Antonio, TX: Harcourt Assessment; 1976.
- Grober E, Sliwinski M, Korey SR. Development and validation of a model for estimating premorbid verbal intelligence in the elderly. *J Clin Exp Neuropsychol*. 1991;**13**:933–949.
- Zachary RA. *Shipley Institute of Living Scale, Revised Manual*. Los Angeles, CA: Western Psychological Services, 1986; 1986.
- Kluger A, Ferris SH, Golomb J, Mittelman MS, Reisberg B. Neuropsychological prediction of decline to dementia in nondemented elderly. *J Geriatr Psychiatry Neurol*. 1999;**12**:168.

Test of Functional Health Literacy in Adults (TOFHLA) and baseline differences in physical function

|          | n (%)      | Physical Function |                    |                  |
|----------|------------|-------------------|--------------------|------------------|
|          |            | Mean (SD)         | Unadjusted p value | Adjusted p value |
| TOFHLA   |            |                   | <0.001             | 0.135            |
| Low      | 49 (9.4)   | 72.9              |                    |                  |
| Marginal | 84 (16.1)  | 76.9              |                    |                  |
| Adequate | 390 (74.6) | 85.8              |                    |                  |

**Note: Adjusted p-values were multivariable analyses controlling for age, gender, race, education, smoking, exercise frequency, alcohol consumption, BMI, and chronic conditions**

Rapid Estimate of Adult Literacy in Medicine (REALM) and baseline differences in physical function

|          | n (%)      | Physical Function |                    |                  |
|----------|------------|-------------------|--------------------|------------------|
|          |            | Mean (SD)         | Unadjusted p value | Adjusted p value |
| REALM    |            |                   | <0.001             | 0.941            |
| Low      | 35 (6.6)   | 74.4              |                    |                  |
| Marginal | 78 (14.7)  | 76.3              |                    |                  |
| Adequate | 416 (78.6) | 85.3              |                    |                  |

**Note: Adjusted p-values were multivariable analyses controlling for age, gender, race, education, smoking, exercise frequency, alcohol consumption, BMI, and chronic conditions**

---

 Test of Functional Health Literacy in Adults (TOFHLA) and physical function decline
 

---

|          | Physical function |             | $\chi^2$ p value | OR (95%CI)       | p value |
|----------|-------------------|-------------|------------------|------------------|---------|
|          | No decline (%)    | Decline (%) |                  |                  |         |
| TOFHLA   |                   |             | 0.003            |                  |         |
| Low      | 66.7              | 33.3        |                  | 1.18 (0.51-2.77) | 0.698   |
| Marginal | 71.4              | 28.6        |                  | 0.99 (0.50-1.97) | 0.971   |
| Adequate | 83.1              | 16.9        |                  | Ref              | Ref     |

**Note: Multivariable analyses were adjusted for age, gender, race, education, smoking, exercise frequency, alcohol consumption, BMI, and chronic conditions, time since baseline interview ( $\leq 36$  months,  $>36$  months) and baseline physical function**

---

 Rapid Estimate of Adult Literacy in Medicine (REALM) and physical function decline
 

---

|          | Physical function |             | $\chi^2$ p value | OR (95%CI)       | p value |
|----------|-------------------|-------------|------------------|------------------|---------|
|          | No decline (%)    | Decline (%) |                  |                  |         |
| REALM    |                   |             | <0.001           |                  |         |
| Low      | 55.9              | 44.1        |                  | 1.63 (0.63-4.24) | 0.316   |
| Marginal | 73.1              | 26.9        |                  | 1.09 (0.55-2.16) | 0.811   |
| Adequate | 82.7              | 17.3        |                  | Ref              | Ref     |

**Note: Multivariable analyses were adjusted for age, gender, race, education, smoking, exercise frequency, alcohol consumption, BMI, and chronic conditions, time since baseline interview ( $\leq 36$  months,  $>36$  months) and baseline physical function**
